# Supplementary material for: Room-temperature synthesis of hierarchical nanostructures on ZnO nanowire anodes for dye-sensitized solar cells
Source: Royal Society of Chemistry journal article supplement (doi:10.1039/c1jm11681a), 2011-01-01
Supplement: c1jm11681a.pdf [file c1jm11681a.pdf]

## Electronic Supplementary Information

### Room-Temperature Synthesis of Hierarchical Nanostructures on ZnO Nanowire Anodes for Dye-Sensitized Solar Cells

*Chun-Te Wu and Jih-Jen Wu\**

Department of Chemical Engineering, National Cheng Kung University, Tainan 701,  
Taiwan

AUTHOR EMAIL ADDRESS wujj@mail.ncku.edu.tw

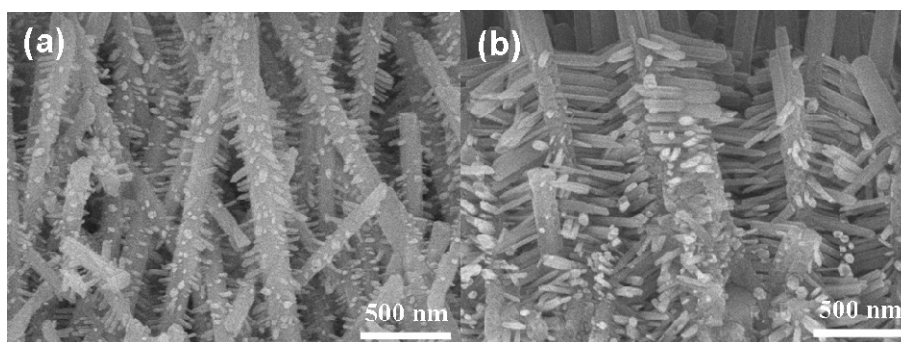

**Figure S1** Cross-sectional and high-magnification SEM images of (a) ZnO ND-30 and (b) ZnO ND-60 arrays.
